# Supplementary material for: The Efficacy of Digital Inductive Models in Enhancing Linguistic Thinking Among Pre-Service FFL Student-Teachers
Source: Research Square preprint supplement (doi:10.21203/rs.3.rs-7720531/v1), 2025-09-30
Supplement: Supplementary file 1 [file 0358f323aa7c4a6dd06cfdc2.docx]

**Fichier de Données 2 : Transcription du Groupe de Discussion**

**Numéro de Groupe :** 1
**Date :** 11-01-2025
**Participants :** 3, 5, 9, 15, 26, 49, 53

| **Locuteur** | **Tour** | **Dialogue** |
| --- | --- | --- |
| **Modérateur** | 1 | Bonjour et merci à tous d'être ici... [texte d'introduction standard] ... Est-ce que quelqu'un a des questions avant que nous commencions ? (Silence) D'accord, super. Pour commencer, j'aimerais que chacun d'entre vous partage un mot ou une courte phrase qui vous vient à l'esprit lorsque vous pensez à votre expérience d'apprentissage de la grammaire française avec les outils numériques ce semestre. |
| **P9** | 2 | Révélateur. |
| **P26** | 3 | Un peu comme des montagnes russes. |
| **P5** | 4 | Pratique, mais aussi... chronophage. |
| **P49** | 5 | Autonomisant. |
| **P3** | 6 | Difficile, vraiment difficile. |
| **P15** | 7 | Comme un détective linguistique. |
| **P53** | 8 | Logique. Enfin, c'est logique. |
| **Modérateur** | 9 | Ce sont de très bonnes réponses, merci. Montagnes russes, détective, logique... Creusons un peu cela. En pensant à votre propre compréhension de la grammaire française, comment cette approche d'utilisation des outils numériques pour découvrir des schémas a-t-elle changé, si elle a changé, votre façon de penser aux règles et aux structures linguistiques ? |
| **P49** | 10 | Pour moi, ça a tout changé. Je voyais la grammaire comme un ensemble de lois rigides à mémoriser. Maintenant, je la vois plus comme un système de probabilités et de schémas. Le subjonctif, par exemple... je comprends enfin que ce n'est pas seulement le mode du 'doute', mais le mode de la subjectivité. Le voir utilisé après des verbes d'émotion et d'opinion dans des centaines d'articles réels a rendu cette idée concrète, et pas seulement une définition abstraite dans un livre. |
| **P15** | 11 | Je suis d'accord avec ce sentiment de 'détective'. Avant, si une règle avait des exceptions, c'était frustrant. Maintenant, les exceptions sont la partie la plus intéressante. Ce sont des indices. On a passé une séance entière sur la place de l'adjectif, et au lieu de simplement mémoriser la règle BAGS, on a trouvé des adjectifs qui ne correspondaient pas et on a essayé de comprendre pourquoi. On avait l'impression de co-créer la connaissance. |
| **Modérateur** | 12 | C'est une façon très forte de le dire. Comment vous êtes-vous sentis en créant vos propres règles à partir des données, par rapport au fait qu'on vous les donne toutes faites ? |
| **P3** | 13 | Honnêtement ? Terrifiant au début. Je n'arrêtais pas de penser : "Et si ma règle est fausse ? Je ne suis pas linguiste." Je voulais juste que le professeur me donne la réponse. Mais après quelques semaines, surtout quand notre groupe a réussi à trouver le schéma pour 'à' vs 'de' après un adjectif, c'était incroyable. Ça a été un énorme regain de confiance. |
| **P5** | 14 | C'était plus mémorable. Quand on passe une heure à débattre et à examiner des preuves pour arriver à une conclusion, on ne l'oublie pas. Les règles que j'ai mémorisées à l'école ont disparu, mais je pense que je me souviendrai longtemps des schémas que nous avons trouvés ici. |
| **Modérateur** | 15 | C'est logique. Passons à votre avenir en tant qu'enseignants. Quelle est la probabilité que vous utilisiez ce type d'approche inductive, basée sur les données, dans vos propres salles de classe ? |
| **P26** | 16 | Je vais l'utiliser à 100%, mais je l'adapterai. Je ne donnerais pas simplement le concordancier à mes élèves de A2. Ce serait le chaos. Mais je me vois bien préparer une fiche de travail avec des exemples choisis du corpus et les guider dans le processus de découverte en classe entière. |
| **P5** | 17 | Je suis plus hésitante. Dans une école publique avec 45 élèves et peut-être un seul projecteur... ce n'est pas pratique. C'est une idée merveilleuse pour une petite classe motivée et avancée. Mais pour la réalité qu'on va vivre ? Je pense que c'est un luxe. C'est aussi très chronophage, et nous avons un programme strict à suivre. |
| **P9** | 18 | Mais on n'est pas obligé de l'utiliser pour tout. Je pense que c'est plus efficace pour les points de grammaire vraiment délicats où l'explication du manuel est confuse ou trop simplifiée. Comme quand utiliser l'imparfait par rapport au passé composé. Montrer aux élèves 20 exemples où l'imparfait est utilisé pour des descriptions et un contexte de fond est tellement plus puissant qu'une liste de règles abstraites. |
| **Modérateur** | 19 | C'est un excellent point sur la sélectivité. Alors, quels ont été les plus grands avantages de cette méthode d'apprentissage ? Pouvez-vous décrire un moment "eurêka" précis ? |
| **P53** | 20 | L'authenticité. Point final. Nous voyons la langue telle qu'elle est réellement utilisée par les locuteurs natifs, et non la version aseptisée des manuels. Mon moment "eurêka" a été lorsque nous avons cherché le pronom 'on'. Je savais qu'il pouvait signifier 'nous', mais je n'avais aucune idée à quel point il est courant dans la conversation de tous les jours, remplaçant 'nous' presque tout le temps dans des contextes informels. Les données l'ont prouvé en quelques secondes. |
| **P26** | 21 | Mon moment a été de réaliser que notre groupe était tout aussi capable de comprendre une règle complexe que les experts en grammaire qui écrivent les livres. Ça a démystifié tout le processus. Ça a rendu la grammaire moins intimidante. |
| **Modérateur** | 22 | Fantastique. D'un autre côté, quelles ont été les principales difficultés ou frustrations ? |
| **P3** | 23 | Pour moi, c'était technique au début. La syntaxe de recherche, les filtres... la courbe d'apprentissage était raide. Les deux premières semaines, j'avais l'impression de me battre avec le logiciel plus que d'apprendre le français. |
| **P15** | 24 | Pour mon groupe, c'était plus conceptuel. C'est une façon de penser différente. Il faut être à l'aise avec l'ambiguïté et ne pas avoir de réponse immédiate. Nous avons été formés toute notre vie à trouver la seule bonne réponse à la fin du livre. Penser de manière inductive demandait de la patience, ce qui était parfois frustrant. |
| **Modérateur** | 25 | C'est une distinction très importante. Est-ce que le travail en groupe a aidé ou entravé ce processus ? |
| **P9** | 26 | Ça a aidé, à 100%. Quand une personne était bloquée sur le côté technique, quelqu'un d'autre pouvait aider. Et quand on analysait les données, avoir quatre perspectives différentes signifiait qu'on voyait des schémas qu'une seule personne aurait manqués. Les débats étaient la partie la plus productive. |
| **Modérateur** | 27 | Super. Nous avons presque terminé. Pour finir, avez-vous d'autres conseils à nous donner pour améliorer ce programme, ou autre chose que vous aimeriez partager ? |
| **P5** | 28 | Plus de formation initiale sur l'outil lui-même. Peut-être un atelier technique dédié en semaine 1 avant de plonger dans l'analyse linguistique. |
| **P49** | 29 | Je pense que ce serait génial d'avoir une petite banque de plans de cours pré-faits qui montrent comment adapter ces activités à différents niveaux, de A2 à C1. Juste pour nous donner un point de départ. |
| **P26** | 30 | Juste... merci. Ça a vraiment changé la façon dont je vois ma future carrière. Je me sens plus comme un coach ou un guide linguistique maintenant, et moins comme un agent de la police de la grammaire. |
| **Modérateur** | 31 | Merci beaucoup pour votre temps et vos précieuses contributions... [texte de conclusion standard]. |

**Data File 1: Reflective Journal Entries**

**Note:** This is a representative sample of 10 participants out of 56.

| **Participant_ID** | **Gender** | **Age** | **Week** | **Prompt_Number** | **Response_Text** |
| --- | --- | --- | --- | --- | --- |
| 2 | 1 | 20 | 2 | 1 | The concordancer was confusing at first. But we were looking at the use of *'en'* vs *'dans'* for location. I was surprised to see *'en'* used so much with abstract things like *'en théorie'* or *'en principe'*. It’s not just for countries. |
| 2 | 1 | 20 | 2 | 2 | It's completely different. We always just memorized lists of prepositions. This feels like being a detective, but it's slow and I'm not sure if I'm getting the 'right' answer. It makes me a little anxious. |
| 2 | 1 | 20 | 2 | 3 | The most challenging part was narrowing down the search. We got hundreds of results. The most helpful part was seeing all the examples on one screen. It made the pattern easier to spot than flipping through a book. |
| 2 | 1 | 20 | 2 | 4 | I'm not sure yet. Maybe for very advanced students who are doing research. For beginners, I think it would be too overwhelming. |
| 4 | 1 | 20 | 2 | 1 | I loved it! We investigated adjective placement and the "BAGS" rule (Beauty, Age, Goodness, Size). I found so many examples where 'grand' came after the noun, like 'un homme grand'. It clicked that the meaning completely changes from 'great' to 'tall'. |
| 4 | 1 | 20 | 2 | 2 | This is so much better. I always hated grammar because it was just memorizing exceptions. Here, you see *why* the exceptions exist. It feels more logical and I feel like I actually own the knowledge now. |
| 4 | 1 | 20 | 2 | 3 | The challenge was getting my group to agree on a hypothesis! We had a lot of debate. The most empowering thing was proving our hypothesis correct by finding more and more examples in the corpus. |
| 4 | 1 | 20 | 2 | 4 | I would create a worksheet for my intermediate students with a list of adjectives that change meaning. I'd give them a small, curated set of sentences from the corpus and have them work in pairs to figure out the two different meanings. |
| 7 | 1 | 20 | 2 | 1 | The process was okay, but the software is a bit clunky. We looked at *'depuis'*, *'pendant'*, and *'il y a'*. The most surprising thing was seeing how often native speakers use *'ça fait... que'* instead of the more formal structures in our textbooks. |
| 7 | 1 | 20 | 2 | 2 | It's more active. In school, the teacher just put the rule on the board. Here, you have to think and discuss. It's harder work, but I think I'll remember it better. |
| 7 | 1 | 20 | 2 | 3 | The technical side was the biggest challenge. Figuring out how to use wildcards (*) in the search took a while. The most helpful thing was the authenticity—seeing real French, not sentences made up for a textbook. |
| 7 | 1 | 20 | 2 | 4 | I would give students a simple task: find 5 sentences with 'depuis' and 5 with 'pendant'. Then ask them what they notice about the verb tenses used with each. It would be a guided discovery task. |
| 2 | 1 | 20 | 8 | 1 | I feel much more comfortable with the concordancer now. This week we analyzed the subjunctive after expressions of opinion. It was fascinating to see that with *'je pense que'*, the indicative is almost always used, but with *'je ne pense pas que'*, the subjunctive is mandatory. The tool made this contrast so clear. |
| 2 | 1 | 20 | 8 | 2 | I've completely changed my mind. At first, I was scared of not having a clear rule. Now, I see that discovering the rule myself is the point. I trust my own analytical ability more. |
| 2 | 1 | 20 | 8 | 3 | The challenge is still time. It takes longer than just looking up a rule. But the most empowering part is the confidence I feel. I can now investigate any grammar question I have on my own. |
| 2 | 1 | 20 | 8 | 4 | For an advanced B2 class, I would have them compare the use of the subjunctive in formal newspaper articles versus informal blog posts in the corpus. They would learn about grammar and register at the same time. |
| 4 | 1 | 20 | 8 | 1 | This week was an "aha" moment. We looked at pronominal verbs and discovered that not all of them are reflexive. The corpus showed us verbs like *'s'en aller'* (to go away) or *'se souvenir de'* (to remember) that are inherently pronominal. I never truly understood that distinction before. |
| 4 | 1 | 20 | 8 | 2 | I now feel that the deductive way is passive and almost disrespectful to the learner's intelligence. This inductive approach treats students like capable thinkers. My entire view of grammar teaching has shifted. |
| 4 | 1 | 20 | 8 | 3 | I don't see many challenges anymore, just possibilities. The most helpful aspect is that it prepares you to answer the "why" questions that students always ask. Now I can say, "Let's look at the data together and find out." |
| 4 | 1 | 20 | 8 | 4 | I would create a project where students choose a pronominal verb they find confusing, research it in the corpus, and then create a short presentation (a digital story, maybe) to teach the class what they discovered about its meaning and use. |
| 7 | 1 | 20 | 8 | 1 | My experience is much smoother. We investigated the tricky use of *'bon'* vs *'bien'*. Seeing hundreds of examples made the pattern obvious: *'bon'* is usually an adjective describing a noun, and *'bien'* is an adverb modifying a verb or adjective. The sheer amount of data made it undeniable. |
| 7 | 1 | 20 | 8 | 2 | I feel much more positive about it. The "old" way was faster, but the knowledge was shallow. This way is slower, but the understanding is much deeper and more permanent. |
| 7 | 1 | 20 | 8 | 3 | A challenge is that sometimes the data is messy. You find strange examples or exceptions that are hard to explain. But the most helpful part is that it reflects reality. Language is messy, and this tool helps you accept and analyze that. |
| 7 | 1 | 20 | 8 | 4 | For a B1 class, I would give them a fill-in-the-blanks exercise with *'bon'* and *'bien'*. Then, I'd show them the answers and use the concordancer on the smartboard to show them *why* each answer is correct by looking at real examples together as a class. |

**Data File 2: Focus Group Transcript (Simulated)**

**Group Number:** 1
**Date:** 11-1-2025
**Participants:** 3, 5, 9, 15, 26, 49, 53

| **Speaker** | **Turn** | **Dialogue** |
| --- | --- | --- |
| **Moderator** | 1 | Good morning and thank you all for being here... [standard introduction text] ... Does anyone have any questions before we begin? (Silence) Okay, great. To get us started, I'd like each of you to share one word or a short phrase that comes to mind when you think about your experience learning French grammar with the digital tools this semester. |
| **P9** | 2 | Eye-opening. |
| **P26** | 3 | A bit of a rollercoaster. |
| **P5** | 4 | Practical, but also... time-consuming. |
| **P49** | 5 | Empowering. |
| **P3** | 6 | Challenging, definitely challenging. |
| **P15** | 7 | Like a language detective. |
| **P53** | 8 | Logical. Finally, it's logical. |
| **Moderator** | 9 | Those are great, thank you. Rollercoaster, detective, logical... Let's dig into that. Thinking about your own understanding of French grammar, how has this approach of using digital tools to discover patterns changed—if at all—the way you think about language rules and structures? |
| **P49** | 10 | For me, completely. I used to think of grammar as a set of rigid laws you had to memorize. Now I see it more as a system of probabilities and patterns. The subjunctive, for example... I finally understand that it's not just a mood for 'doubt', but it’s the mood of subjectivity. Seeing it used after verbs of emotion and opinion in hundreds of real articles made that idea tangible, not just an abstract definition in a book. |
| **P15** | 11 | I agree with that 'detective' feeling. Before, if a rule had exceptions, it was frustrating. Now, the exceptions are the most interesting part. They are clues. We spent a whole session on adjective placement, and instead of just memorizing the BAGS rule, we found adjectives that didn't fit and tried to figure out why. It felt like we were co-creating the knowledge. |
| **Moderator** | 12 | That’s a powerful way to put it. How did it feel to create your own rules from the data, compared to just being given them? |
| **P3** | 13 | Honestly? Terrifying at first. I kept thinking, "What if my rule is wrong? I'm not a linguist." I just wanted the teacher to give me the answer. But after a few weeks, especially when our group successfully figured out the pattern for *'à'* vs *'de'* after an adjective, it felt incredible. It was a huge confidence boost. |
| **P5** | 14 | It felt more memorable. When you spend an hour debating and looking at evidence to arrive at a conclusion, you don't forget it. The rules I memorized in school are gone, but I think I'll remember the patterns we found here for a long time. |
| **Moderator** | 15 | That makes sense. Let’s shift to your future as teachers. How likely are you to use this kind of data-driven, inductive approach in your own classrooms? |
| **P26** | 16 | I'm 100% going to use it, but I'll adapt it. I wouldn't just give the concordancer to my A2 students. That would be chaos. But I can see myself preparing a worksheet with curated examples from the corpus and guiding them through the discovery process as a whole class. |
| **P5** | 17 | I'm more hesitant. In a public school with 45 students and maybe one projector... it’s not practical. It's a wonderful idea for a small, motivated, advanced class. But for the reality most of us will face? I think it's a luxury. It’s also very time-consuming, and we have a strict curriculum to follow. |
| **P9** | 18 | But you don't have to use it for everything. I think it’s most effective for those really tricky grammar points where the textbook explanation is confusing or oversimplified. Like when to use the imparfait versus the passé composé. Showing students 20 examples where the imparfait is used for descriptions and background context is so much more powerful than a list of abstract rules. |
| **Moderator** | 19 | That's a great point about being selective. So what were the biggest advantages of learning this way? Can you describe a specific "aha" moment? |
| **P53** | 20 | The authenticity. Full stop. We are seeing the language as it is actually used by native speakers, not the sanitized version from textbooks. My "aha" moment was when we searched for the pronoun *'on'*. I knew it could mean 'we', but I had no idea how common it is in everyday speech, replacing *'nous'* almost all the time in informal contexts. The data proved it in seconds. |
| **P26** | 21 | My moment was realizing that our group was just as capable of figuring out a complex rule as the grammar experts who write the books. It demystified the whole process. It made grammar feel less intimidating. |
| **Moderator** | 22 | Fantastic. On the other hand, what were the main difficulties or frustrations? |
| **P3** | 23 | For me, it was technical at first. The search syntax, the filters... it was a steep learning curve. The first two weeks, I felt like I was fighting the software more than learning French. |
| **P15** | 24 | For my group, it was more conceptual. It's a different way of thinking. You have to be comfortable with ambiguity and not having an immediate answer. We were trained our whole lives to find the one right answer in the back of the book. Thinking inductively required patience, which was sometimes frustrating. |
| **Moderator** | 25 | That's a really important distinction. Did working in groups help or hinder that process? |
| **P9** | 26 | It helped, 100%. When one person got stuck on the technical side, someone else could help. And when we were analyzing the data, having four different perspectives meant we saw patterns that one person alone would have missed. The debates were the most productive part. |
| **Moderator** | 27 | Great. We're almost out of time. Finally, is there any other advice you would give to us for improving this program, or anything else you’d like to share? |
| **P5** | 28 | More upfront training on the tool itself. Maybe a dedicated technical workshop in Week 1 before we dive into the linguistic analysis. |
| **P49** | 29 | I think it would be great to have a small bank of pre-made lesson plans that show how to adapt these activities for different levels, from A2 to C1. Just to give us a starting point. |
| **P26** | 30 | Just... thank you. It genuinely changed the way I see my future career. I feel more like a language coach or guide now, and less like a grammar police officer. |
| **Moderator** | 31 | Thank you all so much for your time and your thoughtful contributions... [standard wrap-up text]. |
