# Supplementary material for: The Efficacy of Digital Inductive Models in Enhancing Linguistic Thinking Among Pre-Service FFL Student-Teachers
Source: Research Square preprint supplement (doi:10.21203/rs.3.rs-7720531/v1), 2025-09-30
Supplement: Supplementary file 2 [file 698786cf970d5d6c94bbbf4a.xlsx]

## Sheet: Sheet1
Word	Length	Count	Weighted Percentage (%)	Similar Words
abstract	8	205	1.2	ability, abstract, age, amount, analysis, background, book, change, class, conceptual, contrast, corpus, data, date, distinction, ensemble, evidence, feel, feeling, figure, first, formation, future, good, goodness, group, hand, hour, knowledge, language, list, lot, meaning, mind, mode, moment, notice, nous, number, opinion, part, place, placement, plus, point, presentation, process, public, rappo…
give	4	93	1.14	answer, back, bank, board, contributions, create, date, dedicated, fill, fin, fit, get, give, hand, help, let, look, lot, makes, mean, opening, passe, phrase, place, pour, presentation, put, remember, share, show, spend, thank, tool, trust, use, word
que	3	20	0.85	que, que'
changed	7	106	0.8	adapt, age, approach, back, better, boost, career, change, changed, changes, clear, conclusion, confuse, correct, curve, dive, experience, felt, figure, fill, find, fit, focus, formation, full, get, going, help, introduction, let, modifying, narrowing, number, opening, point, process, replacing, right, set, shallow, shift, shifted, size, slow, spot, still, stop, teach, thing, think, time, turn, w…
time	4	56	0.79	approach, bit, correct, date, est, example, experience, future, hour, moment, morning, now, old, sentences, set, time
les	3	18	0.77	les
active	6	124	0.74	active, activities, analysis, answer, back, boost, career, change, class, dig, exercise, feel, fighting, first, fit, formation, going, hand, help, intelligence, location, look, looking, mot, part, patience, pattern, person, phrase, place, placement, presentation, process, project, research, response, rule, search, set, share, short, show, someone, spot, starting, task, teaching, training, transcr…
group	5	56	0.73	bank, book, class, corpus, data, ensemble, formation, french, group, groupe, groups, hand, lot, public, school, set, syntax, system, type
person	6	67	0.73	active, agent, arriver, beauty, better, change, coach, date, detective, examiner, face, figure, great, guide, help, learner, linguist, longer, lot, mandatory, mind, moderator, mon, native, officer, part, participant, person, representative, simple, someone, speaker, tool, type, utiliser
des	3	17	0.72	des
une	3	16	0.68	une
point	5	72	0.63	amount, back, conclusion, date, first, focus, guide, guided, guiding, indicative, indices, levels, location, meaning, moment, part, place, point, points, right, sheer, show, showed, showing, spot, stop, sur, time, work, workshop
see	3	95	0.57	abstract, contrast, date, discover, discovered, discovering, examiner, experience, feel, figure, figured, figuring, find, finding, learn, learning, like, look, looked, looking, notice, project, realizing, screen, search, see, seeing, sense, think, tour, understand, understanding, view
process	7	87	0.55	advanced, career, challenge, change, distinction, explanation, eye, feeling, figure, file, formation, knowledge, language, learning, narrowing, notice, process, response, rule, search, seeing, set, thinking, tool, transcription, travail, treats, turn, understanding, use, work, working
think	5	104	0.54	abstract, accept, analysis, book, change, choose, class, compare, explanation, feel, figure, figuring, find, focus, idea, intelligence, like, mean, meaning, meanings, place, process, project, remember, research, see, steep, think, thinking, thoughtful, time, type, view
amount	6	73	0.53	age, amount, bit, boost, comes, conclusion, date, figure, fill, first, hour, little, lot, moment, morning, much, number, point, school, semester, set, spot, standard, time, tour, turn, week
successfully	12	20	0.48	great, made, opening, person, productive, someone, successfully
informal	8	82	0.47	background, book, change, coach, comment, common, confidence, conversation, curriculum, describe, discover, everyday, evidence, example, explain, give, informal, intelligence, introduction, knowledge, learn, list, moment, notice, point, presentation, program, programme, prompt, register, representative, sample, show, speaker, specific, story, teach, time, tout, word
knowledge	9	92	0.47	ability, background, evidence, example, experience, feeling, hand, idea, intelligence, knowledge, language, learning, meaning, mind, nous, opinion, pattern, place, point, process, program, programme, reality, representative, rule, sample, search, sense, sentiment, set, specific, speech, syntax, system, thinking, trust, understanding, version, view
pas	3	11	0.47	pas
whole	5	60	0.46	approach, board, complex, entire, face, felt, figure, fin, full, future, good, guide, native, one, opening, pattern, person, sample, screen, side, someone, story, system, thing, type, way, whole, working, wrap
positive	8	67	0.44	adjective, adverb, amount, back, distinction, face, first, formal, formation, list, note, par, place, placement, plus, point, positive, presentation, put, set, short, turn, undeniable, way
examples	8	29	0.43	beauty, bit, example, examples, exercise, guide, lesson, pattern, representative, sample, time
feel	4	64	0.43	complex, confidence, emotion, experience, feel, feeling, feels, find, finding, idea, look, looked, looking, mood, opinion, regain, search, see, sense, sentiment, thing, think
c'est	5	10	0.43	c'est
vous	4	10	0.43	vous
number	6	43	0.4	100, amount, book, comes, figure, fin, find, first, four, list, number, one, par, real, size, two
rule	4	34	0.39	find, finding, opinion, pattern, patterns, powerful, process, rule, rules
work	4	75	0.39	analysis, answer, atelier, bank, book, complex, create, dig, exercise, fill, get, going, help, journal, learning, lieu, location, number, part, place, practical, project, research, search, still, task, text, textbook, travail, turn, understand, use, work, working, workshop
students	8	9	0.38	students
dans	4	9	0.38	dans, 'dans'
mais	4	9	0.38	mais
modérateur	10	9	0.38	modérateur
idea	4	72	0.36	abstract, amount, beauty, complex, example, feeling, figuring, hypothesis, idea, kind, meaning, mind, opinion, part, pattern, program, programme, project, right, rule, sentiment, standard, system, teacher, thing, thoughtful, turn, view, way, whole
part	4	71	0.36	back, bit, context, contributions, corpus, curve, face, fill, forte, going, hand, language, lieu, location, officer, part, place, point, process, right, saw, share, side, signifier, small, started, starting, system, thing, turn, way, word
exceptions	10	10	0.35	especially, example, exceptions, representative
linguist	8	18	0.35	grammar, linguist, linguiste, linguistic, person, someone, syntax
set	3	35	0.35	background, change, context, contexte, contextes, contexts, contrast, correct, date, exercise, fit, group, hard, location, lot, place, placement, prepares, preparing, put, right, rigid, rigides, set, write
create	6	67	0.34	confuse, create, creating, discover, figure, find, follow, found, get, give, makes, pattern, place, program, programme, project, prompt, put, see, set, short, show, think, work, write
p26	3	8	0.34	p26
presentation	12	45	0.33	date, give, immediate, moment, now, place, presentation, program, programme, representative, set, show, time
helpful	7	25	0.32	better, boost, guide, hand, help, helped, helpful, helps, look, see, work
use	3	43	0.32	board, exercise, follow, give, help, old, practical, put, share, task, use, used, using, utiliser, work
write	5	58	0.32	analysis, blog, book, conclusion, create, describe, dialogue, hand, introduction, journal, language, laws, note, notice, opening, opinion, place, point, program, put, set, shift, software, spot, story, text, transcript, type, version, word, work, write
just	4	23	0.31	good, goodness, hard, just, juste, right, 'right'
class	5	27	0.3	agent, class, classe, future, gender, group, number, person, size, teaching, workshop
fit	3	49	0.3	adapt, agree, answer, correct, fin, fit, going, just, mode, point, set, way
getting	7	56	0.3	accept, arrive, arriver, begin, change, clear, comes, commencer, confuse, discover, feel, find, get, getting, give, going, let, makes, mean, process, prompt, regain, share, started, starting, takes, turn, understand, work
comme	5	7	0.3	comme
grammaire	9	7	0.3	grammaire
digital	7	19	0.29	change, digital, figure, figured, figuring, fin, four, one, two
syntax	6	14	0.29	grammar, syntax, syntaxe, system
plans	5	41	0.28	book, idea, mean, pattern, plans, prepares, preparing, program, programme, project, system, think, thinking, time
completely	10	17	0.27	completely, conclusion, entire, fill, full, good, realizing, sheer, whole
expressions	11	37	0.27	ambiguity, answer, comment, explain, expressions, get, give, language, note, notice, phrase, pronominal, reflective, reflects, response, saw, speech
thing	5	41	0.27	abstract, back, bit, change, corpus, feeling, group, main, part, process, shallow, small, system, thing, things
word	4	20	0.26	adjective, adverb, language, noun, pronoun, signifier, speech, verb, word
avec	4	6	0.26	avec
été	3	6	0.26	été
p15	3	6	0.26	p15
p49	3	6	0.26	p49
pense	5	6	0.26	pense
find	4	43	0.25	change, detective, 'detective', discover, discovered, discovering, discovery, feel, find, finding, get, getting, location, notice, number, place, regain, see, sense
going	5	54	0.25	active, agree, approach, back, career, change, choose, clear, compare, correct, dive, file, fin, follow, going, lives, passe, process, school, search, see, set, shift, started, starting, stop, tool, tour, turn, work
nous	4	18	0.25	knowledge, mind, nous, 'nous', sense
telle	5	43	0.25	abstract, answer, comment, contrast, discover, effective, explain, give, look, mean, note, notice, place, point, show, telle, thank
learning	8	25	0.24	coach, exercise, knowledge, learn, learning, memorable, memorize, memorized, memorizing, school, takes, teach, teaching, work
powerful	8	27	0.24	ability, hand, intelligence, knowledge, language, mind, officer, powerful, puissant, right, 'right', sense, speech, system, technique, understanding
questions	9	14	0.24	ask, challenge, 'doubt', examiner, question, questions, speaker, wonderful
right	5	35	0.24	abstract, hand, just, place, right, 'right', truly, turn, use
sense	5	34	0.24	discover, find, look, looking, meaning, notice, nous, seeing, sense, signifier, understand, view
confusing	9	8	0.23	change, chaos, confuse, confusing, get
inductive	9	8	0.23	inductive, inductively, introduction, learn, teach
mode	4	9	0.23	indicative, mode, mood, subjunctive
much	4	12	0.23	lot, much, often, practical
patterns	8	38	0.23	agree, example, figure, figured, figuring, fit, pattern, patterns, practical, program, programme, spot, standard, use, using
structures	10	25	0.23	back, complex, guide, knowledge, opening, pattern, sample, school, screen, spot, still, stop, story, structures, syntax, system
verb	4	7	0.23	verb, verbes, verbs
technical	9	13	0.22	experts, point, technical
tool	4	25	0.22	bit, file, process, saw, smoother, tool, tools, way, work
100	3	7	0.21	100, hundreds
avons	5	5	0.21	avons
confidence	10	18	0.21	capable, confidence, discover, give, hand, positive, sure, trust
looking	7	37	0.21	agree, aspect, bank, expressions, eye, face, feel, fit, look, looked, looking, search, searched, see, trust, view
modifying	9	21	0.21	adjective, adverb, change, moderator, modifying, person, positive, someone
c'était	7	5	0.21	c'était
données	7	5	0.21	données
quand	5	5	0.21	quand
qui	3	5	0.21	qui
votre	5	5	0.21	votre
evidence	8	19	0.2	evidence, file, note, number, obvious, register, show, story, telle, transcript, version, word, worksheet
like	4	29	0.2	compare, compared, feeling, kind, like, likely, probabilities, see, view
show	4	40	0.2	ask, bit, dig, evidence, expressions, face, give, guide, number, phrase, presentation, program, programme, project, proved, proving, put, register, screen, show, showed, showing, turn, view, word
text	4	20	0.2	book, introduction, language, note, speech, text, textbook, textbooks, texte
actually	8	16	0.19	actually, create, effective, exist, real, reality, realizing, really
advanced	8	21	0.19	advanced, amount, approach, better, boost, clear, get, help, improving, par, shift
consuming	9	19	0.19	board, consuming, fill, overwhelming, sample, spend, takes, use
honestly	8	16	0.18	honestly, just
makes	5	39	0.18	amount, change, create, find, found, get, help, kind, look, makes, number, prepares, preparing, prompt, see, takes, view, work, working
maybe	5	5	0.18	maybe, possibilities
moderator	9	15	0.18	change, discuss, intermediate, moderator, small
real	4	12	0.18	actually, exist, genuinely, real, reality, really, tangible
almost	6	4	0.17	almost
always	6	4	0.17	always
conclusion	10	10	0.17	conclusion, final, finally, mind, stop
'en	3	4	0.17	'en, 'en'
formal	6	13	0.17	clear, courte, formal, logical, pattern, positive
frustrating	11	4	0.17	frustrating, frustrations
indicative	10	26	0.17	advice, evidence, file, hand, hour, indicative, indices, mode, mood, morning, register, show, story, time
memorized	9	11	0.17	learner, learning, memorable, memorize, memorized, memorizing
merci	5	4	0.17	merci
old	3	10	0.17	age, old, used
participants	12	8	0.17	active, activities, back, hand, participant, participants
week	4	6	0.17	week, weeks
bien	4	4	0.17	bien, 'bien'
changé	6	4	0.17	changé
concordancer	12	4	0.17	concordancer
était	5	4	0.17	était
façon	5	4	0.17	façon
fait	4	4	0.17	fait, faites, faits
linguistique	12	4	0.17	linguistique, linguistiques
logique	7	4	0.17	logique
p53	3	4	0.17	p53
penser	6	4	0.17	penser
règle	5	4	0.17	règle
règles	6	4	0.17	règles
réponse	7	4	0.17	réponse, réponses
schémas	7	4	0.17	schémas
très	4	4	0.17	très
advantages	10	22	0.16	advantages, good, plus, point, positive
common	6	19	0.16	class, common, everyday, informal, person, public, someone, standard, usually
contrast	8	15	0.16	contrast, different, distinction, seeing
countries	9	17	0.16	clear, countries, eye, french, place, see
experience	10	22	0.16	change, experience, get, getting, investigate, lives, old, reality, research, souvenir, time
experts	7	20	0.16	detective, examiner, experts, good, goodness, guide, person, practical, someone, tout
hard	4	8	0.16	challenging, hard, set, tricky
loved	5	18	0.16	emotion, fond, like, loved, wanted
reflective	10	28	0.16	comment, compare, evidence, point, reflective, reflects, show, think, thoughtful
wanted	6	21	0.16	like, long, loved, search, trust, wanted
challenge	9	14	0.15	challenge, challenges, challenging, hard, process, question
data	4	11	0.15	data, informal
detective	9	18	0.15	detective, 'detective', discovery, find, investigate, investigated, notice, officer, sense, spot
language	8	21	0.15	ambiguity, conversation, debate, dialogue, discussion, language, phrase, question, saw, session, speech, text, word
location	8	48	0.15	back, clear, eye, find, finding, focus, hand, location, mandatory, opening, part, pattern, place, point, regain, right, side, spot, stop, way, work
meaning	7	28	0.15	get, hated, idea, important, lesson, list, mean, meaning, meanings, number, point, remember, sense, signifier
takes	5	49	0.15	abstract, accept, ask, change, clear, experience, find, get, place, point, see, stop, takes, trained, training, turn, use
analyze	7	12	0.14	analyze, analyzed, analyzing, compare, complex, examiner, research, screen, search
debate	6	10	0.14	challenge, debate, debates, debating, discuss, discussion, word
fantastic	9	7	0.14	fantastic, grand', 'grand', grands, incredible, strange, wonderful
great	5	11	0.14	good, grand', 'grand', grands, great, 'great', important
important	9	20	0.14	good, great, important, main, mean, meaning, moment, strange
mind	4	16	0.14	conclusion, given, intelligence, mind, notice, opinion, remember, sentiment, thinkers, view
opening	7	26	0.14	active, eye, first, found, introduction, opening, person, point, possibilities, public, shift, someone, starting
practical	9	32	0.14	exercise, knowledge, learn, pattern, practical, rule, training, use, working
still	5	5	0.14	change, silence, still, yet
tout	4	7	0.14	tout, toute, toutes
understanding	13	37	0.14	answer, conclusion, dig, discovery, figure, find, focus, follow, get, intelligence, see, sense, understand, understanding, work
accept	6	30	0.13	accept, agree, bank, clear, fit, get, give, good, let, look, okay, sense, standard, takes, trust, understand
adjective	9	8	0.13	adjective, adjectives, positive
aussi	5	3	0.13	aussi
bags	4	4	0.13	bags, project
'de'	4	3	0.13	de', 'de'
empowering	10	3	0.13	empowering
forte	5	20	0.13	forte, part, place, plus
kind	4	21	0.13	good, goodness, kind, like, turn, type, version
maintenant	10	3	0.13	maintenant
moment	6	27	0.13	bit, important, moment, point, secondes, seconds, time
plus	4	17	0.13	forte, good, help, plus, positive
public	6	21	0.13	book, common, introduction, journal, number, public, text, textbook, tout, work
search	6	26	0.13	feel, looking, research, search, searched, see
simulated	9	13	0.13	figure, follow, pattern, show, simulated, technique
way	3	32	0.13	approach, fit, mean, meaning, meanings, mode, opening, part, response, share, tool, way
aha	3	3	0.13	aha
après	5	3	0.13	après
aux	3	3	0.13	aux
avant	5	3	0.13	avant
'bon'	5	3	0.13	'bon'
cette	5	3	0.13	cette
d'apprentissage	15	3	0.13	d'apprentissage
détective	9	3	0.13	détective, 'détective'
différente	10	3	0.13	différente, différentes, différents
élèves	6	3	0.13	élèves
être	4	3	0.13	être
exemples	8	3	0.13	exemple, exemples
idée	4	3	0.13	idée
livre	5	3	0.13	livre, livres
n'est	5	3	0.13	n'est
notre	5	3	0.13	notre
ont	3	3	0.13	ont
passé	5	3	0.13	passé
processus	9	3	0.13	processus
propres	7	3	0.13	propre, propres
qu'on	5	3	0.13	qu'on
semaines	8	3	0.13	semaine, semaines
seule	5	3	0.13	seul, seule
sont	4	3	0.13	sont
suis	4	3	0.13	suis
utilisé	7	3	0.13	utilisé, utilisée
vois	4	3	0.13	vois
vos	3	3	0.13	vos
vraiment	8	3	0.13	vraiment
book	4	19	0.12	book, books, dialogue, guide, introduction, journal, register, text, textbook, word, work
clear	5	21	0.12	back, change, clear, definition, focus, get, intelligence, let, makes, okay, opening, passe, realizing, understand, understanding
discuss	7	15	0.12	debate, dialogue, discuss, discussion, intermediate, language, participant, session, speech, word
distinction	11	14	0.12	clear, contrast, definition, different, distinction, focus, note
good	4	18	0.12	better, change, future, good, goodness, great, honestly, number, right, 'right'
investigated	12	16	0.12	analysis, contrast, detective, examiner, investigate, investigated, research, search, work
motivated	9	11	0.12	driven, figure, idea, motivated, pattern, prompt
partie	6	10	0.12	formal, lot, partie, person, set, someone
passe	5	29	0.12	ask, book, challenge, clear, give, let, location, passe, place, response, spend, turn, work
productive	10	15	0.12	book, good, journal, newspaper, number, presentation, productive, set, work
turn	4	30	0.12	age, amount, bank, better, change, correct, curve, face, fill, formation, get, part, right, sheer, side, starting, turn, version, work
answer	6	15	0.11	agree, answer, answers, fill, fit, response, results, work
comfortable	11	8	0.11	comfortable, help, person, someone, still
logical	7	8	0.11	formal, logical, sense, system
phrase	6	14	0.11	ask, phrase, pronominal, put, response, show, word
adapt	5	9	0.1	ability, adapt, adapter, change, fit, focus, version
authenticity	12	3	0.1	authenticity, genuinely
back	4	10	0.1	back, hinder, okay, place, secondes, seconds, shift, side
compare	7	10	0.1	adjective, adverb, analyze, compare, compared, contrast
complex	7	8	0.1	complex, complexe, feeling, still, whole
conversation	12	17	0.1	change, conversation, debate, dialogue, figuring, informal, language, question, shift, speech
correct	7	20	0.1	change, correct, fit, focus, right, 'right', set, strict, time, turn
different	9	12	0.1	change, contrast, different, distinction, number
discovered	10	12	0.1	describe, describing, discover, discovered, discovering, find, regain
figure	6	30	0.1	amount, dig, figure, figured, figuring, give, idea, number, person, place, process, put, set
grand'	6	6	0.1	focus, grand', 'grand', grands, important, luxury
let	3	20	0.1	accept, back, clear, get, getting, give, let, okay, trust
list	4	7	0.1	list, liste, lists, number, register
speakers	8	4	0.1	examiner, speaker, speakers
'tall'	6	5	0.1	hard, incredible, long, size, 'tall'
also	4	2	0.09	also
articles	8	2	0.09	articles
bonne	5	2	0.09	bonne, bonnes
capable	7	6	0.09	ability, capable, opening, subjectivity
corpus	6	14	0.09	corpus, part, principe'
curated	7	2	0.09	curated
descriptions	12	3	0.09	descriptions, kind
donne	5	2	0.09	donne
effective	9	21	0.09	change, effective, feeling, figure, get, good, goodness, help, meaning, opinion, person, response, results, someone, turn
elle	4	2	0.09	elle
examiner	8	11	0.09	contrast, examiner, final, investigate, proved, proving, question, search, tried
ici	3	2	0.09	ici
instead	7	2	0.09	instead
less	4	2	0.09	less
many	4	2	0.09	many
messy	5	2	0.09	messy
'on'	4	2	0.09	'on'
opinion	7	17	0.09	conclusion, hypothesis, idea, mind, opinion, sentiment, side, thoughtful, view
'pendant'	9	2	0.09	'pendant'
perspectives	12	4	0.09	perspectives, positive, view
petite	6	11	0.09	challenge, little, petite, size, small
programme	9	10	0.09	curriculum, program, programme, show, software, system
quelle	6	3	0.09	fill, quelle, quelles
representative	14	17	0.09	agent, describe, mean, project, representative, rule, show
size	4	14	0.09	class, number, petite, size, small
sometimes	9	3	0.09	old, sometimes
strict	6	4	0.09	rigid, rigides, strict
super	5	3	0.09	passe, super
surprised	9	3	0.09	change, surprised, surprising
teacher	7	8	0.09	abstract, coach, teacher, teachers
temps	5	2	0.09	temps
terrifiant	10	2	0.09	terrifiant, terrifying
together	8	2	0.09	together
treats	6	13	0.09	analyze, correct, discuss, give, treats, wrong
2025	4	2	0.09	2025
'à'	3	2	0.09	'à'
abstraite	9	2	0.09	abstraite, abstraites
adjectif	8	2	0.09	adjectif, adjectifs
aidé	4	2	0.09	aidé
autre	5	2	0.09	autre
avait	5	2	0.09	avait
avoir	5	2	0.09	avoir
biggest	7	2	0.09	biggest
chronophage	11	2	0.09	chronophage
composé	7	2	0.09	composé
comprendre	10	2	0.09	comprendre
côté	4	2	0.09	côté
d'accord	8	2	0.09	d'accord
d'autre	7	2	0.09	d'autre, d'autres
début	5	2	0.09	début
'depuis'	8	2	0.09	'depuis'
difficile	9	2	0.09	difficile
donner	6	2	0.09	donner
else	4	2	0.09	else
enfin	5	2	0.09	enfin
entière	7	2	0.09	entière
eurêka	6	2	0.09	eurêka
française	9	2	0.09	française
frustrant	9	2	0.09	frustrant
got	3	2	0.09	got
imparfait	9	2	0.09	imparfait
'je	3	2	0.09	'je
l'imparfait	11	2	0.09	l'imparfait
l'impression	12	2	0.09	l'impression
locuteur	8	2	0.09	locuteur, locuteurs
lorsque	7	2	0.09	lorsque
l'utiliser	10	2	0.09	l'utiliser
manuel	6	2	0.09	manuel, manuels
mémoriser	9	2	0.09	mémoriser
moi	3	2	0.09	moi
moins	5	2	0.09	moins
montagnes	9	2	0.09	montagnes
numériques	10	2	0.09	numériques
outils	6	2	0.09	outils
partage	7	2	0.09	partage, partager
personne	8	2	0.09	personne
peu	3	2	0.09	peu
peut	4	2	0.09	peut
pouvait	7	2	0.09	pouvait
pratique	8	2	0.09	pratique
presque	7	2	0.09	presque
probabilité	11	2	0.09	probabilité, probabilités
quel	4	2	0.09	quel, quels
quelques	8	2	0.09	quelques
quelqu'un	9	2	0.09	quelqu'un
qu'une	6	2	0.09	qu'une
rendu	5	2	0.09	rendu
rollercoaster	13	2	0.09	rollercoaster
russes	6	2	0.09	russes
serait	6	2	0.09	serait
seulement	9	2	0.09	seulement
simplement	10	2	0.09	simplement
tous	4	2	0.09	tous
trouvé	6	2	0.09	trouvé, trouvés
trouver	7	2	0.09	trouver
versus	6	2	0.09	versus
ask	3	13	0.08	ask, challenge, notice, phrase, question, required, takes, word
begin	5	21	0.08	begin, commencer, formation, introduction, morning, opening, part, point, started, starting
comes	5	18	0.08	approach, arrive, change, comes, experience, follow, get, see
definitely	10	7	0.08	definitely, definition, explanation, standard
flipping	8	6	0.08	change, disrespectful, dive, flipping, passe, turn
follow	6	18	0.08	follow, person, police, someone, understand, use
formation	9	19	0.08	bank, ensemble, file, formation, placement, point, set, side, steep
hypothesis	10	10	0.08	conclusion, given, hypothesis, opinion, possibilities, view
interesting	11	14	0.08	fascinating, interesting, part, right, share, thing
officer	7	10	0.08	detective, officer, place, police, positive, posts, spot
put	3	29	0.08	phrase, place, point, positive, put, set, spend, turn, use, word
response	8	19	0.08	answer, mode, phrase, response, way
agree	5	19	0.07	accept, agree, answer, approach, clear, fit, look, pattern
approach	8	17	0.07	approach, comes, face, future, opening, way
better	6	19	0.07	better, change, fill, good, goodness, help, improving, point, set, turn
clues	5	3	0.07	clues, evidence, wrap
coach	5	10	0.07	coach, learn, teach, teacher, trained, training, work
explanation	11	8	0.07	definition, explanation, thinking, version
fill	4	15	0.07	answer, change, fill, full, missed, steep, takes, turn, work
first	5	17	0.07	begin, commencer, first, opening, point, started, starting
guide	5	11	0.07	example, guide, guided, guiding, hand, passe, show, takes
laws	4	12	0.07	laws, right, 'right', rule
pairs	5	5	0.07	pairs, set, two
prepares	8	10	0.07	create, exercise, learn, prepares, preparing, trained, training
sentences	9	4	0.07	question, sentences
short	5	9	0.07	create, forget, little, presentation, short
side	4	19	0.07	aspect, back, bank, face, formation, hand, opinion, part, positive, side, steep, view
small	5	8	0.07	amount, little, petite, size, small
subjectivity	12	17	0.07	give, person, put, question, someone, subjectivity, thing
system	6	12	0.07	group, program, programme, sample, syntax, system
textbook	8	8	0.07	standard, textbook, textbooks
tried	5	12	0.07	hard, mot, part, proved, share, tried
alone	5	2	0.06	alone, entire
beginners	9	2	0.06	beginners, learner
comment	7	9	0.06	comment, correct, dig, explain, note, notice
conceptual	10	13	0.06	abstract, approach, conceptual, discover, find
difficulties	12	3	0.06	difficulties, travail
entries	7	6	0.06	approach, entries, introduction, opening
place	5	20	0.06	back, contrast, knowledge, place, point, positive, posts, right, set, spot, stop
placement	9	16	0.06	formation, hour, location, placement, positive, set, way
really	6	4	0.06	genuinely, really, truly
selective	9	12	0.06	conclusion, selective, way
teach	5	10	0.06	class, lesson, teach, teaching, workshop
tenses	6	6	0.06	change, future, tenses, turn
board	5	14	0.05	board, get, going, use
clicked	7	2	0.05	clicked, stop
deductive	9	4	0.05	amount, deductive, figure
exist	5	6	0.05	active, exist, lives, opening, reality
fascinating	11	4	0.05	fascinating, interesting, work
filters	7	2	0.05	filters, screen
hour	4	13	0.05	hour, morning, shift, time, tour, turn
missed	6	3	0.05	forget, missed, wanted
probabilities	13	3	0.05	amount, likely, probabilities
proved	6	7	0.05	follow, proved, proving, show, tried
raide	5	4	0.05	raide, search
school	6	6	0.05	school, teaching, trained, training
'se	3	8	0.05	point, 'se
share	5	15	0.05	common, get, share, use
vie	3	6	0.05	place, register, show, vie
analytical	10	1	0.04	analytical
anxious	7	1	0.04	anxious
anymore	7	1	0.04	anymore
away	4	1	0.04	away
bank	4	14	0.04	bank, give, look, side, trust, work
blanks	6	1	0.04	blanks
choose	6	3	0.04	choose, selective, takes
classrooms	10	1	0.04	classrooms
clunky	6	1	0.04	clunky
contributions	13	4	0.04	amount, boost, contributions
courant	7	1	0.04	courant
demystified	11	1	0.04	demystified
describe	8	5	0.04	describe, describing, set, write
dialogue	8	7	0.04	book, dialogue, discussion, word
dig	3	7	0.04	comment, dig, figure, understand
dire	4	1	0.04	dire
disrespectful	13	10	0.04	disrespectful, see, view
excellent	9	1	0.04	excellent
eye	3	14	0.04	eye, look, opinion, see, sentiment, view
faster	6	1	0.04	faster
fond	4	3	0.04	feeling, fond, loved
gone	4	1	0.04	gone
hesitant	8	1	0.04	hesitant
huge	4	1	0.04	huge
'il	3	1	0.04	'il
inherently	10	1	0.04	inherently
intimidating	12	1	0.04	intimidating
introduction	12	8	0.04	introduction, opening, presentation, text, textbook
kept	4	1	0.04	kept
luxe	4	1	0.04	luxe
main	4	3	0.04	important, main, principe'
never	5	1	0.04	never
non	3	1	0.04	non
notice	6	5	0.04	mind, notice, obvious, posts
oversimplified	14	1	0.04	oversimplified
passive	7	1	0.04	passive
permanent	9	1	0.04	permanent
police	6	3	0.04	laws, police
posts	5	9	0.04	list, place, posts, register, standard
prepositions	12	2	0.04	place, prepositions
projector	9	1	0.04	projector
pronoun	7	2	0.04	pronoun, reflexive
realizing	9	4	0.04	realizing, tangible, understanding
recherche	9	1	0.04	recherche
register	8	11	0.04	book, file, list, register, show
replacing	9	8	0.04	change, follow, place, put, replacing, set
required	8	5	0.04	required, thing, wanted
results	7	13	0.04	conclusion, follow, mean, point, results
sanitized	9	2	0.04	change, sanitized
scared	6	1	0.04	scared
semestre	8	1	0.04	semestre
sens	4	1	0.04	sens
session	7	2	0.04	semester, session
sheer	5	11	0.04	guide, point, sheer, steep
shift	5	7	0.04	back, change, shift, shifted, tour, turn, type
slower	6	1	0.04	slower
spent	5	1	0.04	spent
standard	8	7	0.04	common, standard, textbook
started	7	11	0.04	create, morning, opening, set, started, starting, turn
stuck	5	1	0.04	stuck
surtout	7	1	0.04	surtout
task	4	6	0.04	lesson, project, task, work
type	4	7	0.04	face, kind, shift, type, version, write
'un	3	1	0.04	'un
understood	10	1	0.04	understood
upfront	7	1	0.04	upfront
wonderful	9	11	0.04	part, question, thing, wonderful
activités	9	1	0.04	activités
aider	5	1	0.04	aider
aimeriez	8	1	0.04	aimeriez
aller'	6	1	0.04	aller'
alors	5	1	0.04	alors
améliorer	9	1	0.04	améliorer
analysait	9	1	0.04	analysait
anyone	6	1	0.04	anyone
anything	8	1	0.04	anything
approche	8	1	0.04	approche
aseptisée	9	1	0.04	aseptisée
aucune	6	1	0.04	aucune
aurait	6	1	0.04	aurait
autonomisant	12	1	0.04	autonomisant
avancée	7	1	0.04	avancée
avantages	9	1	0.04	avantages
avenir	6	1	0.04	avenir
avez	4	1	0.04	avez
banque	6	1	0.04	banque
basée	5	1	0.04	basée
battre	6	1	0.04	battre
beaucoup	8	1	0.04	beaucoup
bloquée	7	1	0.04	bloquée
bonjour	7	1	0.04	bonjour
'ça	3	1	0.04	'ça
came	4	1	0.04	came
carrière	8	1	0.04	carrière
cela	4	1	0.04	cela
centaines	9	1	0.04	centaines
ces	3	1	0.04	ces
chacun	6	1	0.04	chacun
cherché	7	1	0.04	cherché
choisis	7	1	0.04	choisis
chose	5	1	0.04	chose
commencions	11	1	0.04	commencions
compréhension	13	1	0.04	compréhension
comprends	9	1	0.04	comprends
conceptuel	10	1	0.04	conceptuel
concordancier	13	1	0.04	concordancier
concrète	8	1	0.04	concrète
confiance	9	1	0.04	confiance
connaissance	12	1	0.04	connaissance
conseils	8	1	0.04	conseils
correspondaient	15	1	0.04	correspondaient
cours	5	1	0.04	cours
courbe	6	1	0.04	courbe
créant	6	1	0.04	créant
créer	5	1	0.04	créer
creusons	8	1	0.04	creusons
d'apprendre	11	1	0.04	d'apprendre
d'approche	10	1	0.04	d'approche
d'articles	10	1	0.04	d'articles
d'avoir	7	1	0.04	d'avoir
débats	6	1	0.04	débats
débattre	8	1	0.04	débattre
découverte	10	1	0.04	découverte
découvrir	9	1	0.04	découvrir
décrire	7	1	0.04	décrire
dédié	5	1	0.04	dédié
deeper	6	1	0.04	deeper
définition	10	1	0.04	définition
délicats	8	1	0.04	délicats
demandait	9	1	0.04	demandait
d'émotion	9	1	0.04	d'émotion
démystifié	10	1	0.04	démystifié
d'entre	7	1	0.04	d'entre
départ	6	1	0.04	départ
d'être	6	1	0.04	d'être
deux	4	1	0.04	deux
difficultés	11	1	0.04	difficultés
d'introduction	14	1	0.04	d'introduction
disparu	7	1	0.04	disparu
donnerais	9	1	0.04	donnerais
dont	4	1	0.04	dont
d'opinion	9	1	0.04	d'opinion
'doute'	7	1	0.04	'doute'
d'un	4	1	0.04	d'un
d'utilisation	13	1	0.04	d'utilisation
easier	6	1	0.04	easier
école	5	1	0.04	école
écrivent	8	1	0.04	écrivent
efficace	8	1	0.04	efficace
énorme	6	1	0.04	énorme
entravé	7	1	0.04	entravé
essayé	6	1	0.04	essayé
étaient	7	1	0.04	étaient
êtes	4	1	0.04	êtes
everything	10	1	0.04	everything
expérience	10	1	0.04	expérience
fantastique	11	1	0.04	fantastique
fausse	6	1	0.04	fausse
faut	4	1	0.04	faut
fiche	5	1	0.04	fiche
fichier	7	1	0.04	fichier
filtres	7	1	0.04	filtres
finir	5	1	0.04	finir
formés	6	1	0.04	formés
français	8	1	0.04	français
génial	6	1	0.04	génial
guider	6	1	0.04	guider
harder	6	1	0.04	harder
hésitante	9	1	0.04	hésitante
heure	5	1	0.04	heure
homme	5	1	0.04	homme
honnêtement	11	1	0.04	honnêtement
immédiate	9	1	0.04	immédiate
importante	10	1	0.04	importante
incroyable	10	1	0.04	incroyable
informels	9	1	0.04	informels
initiale	8	1	0.04	initiale
intéressante	12	1	0.04	intéressante
intimidante	11	1	0.04	intimidante
j'ai	4	1	0.04	j'ai
j'aimerais	10	1	0.04	j'aimerais
j'avais	7	1	0.04	j'avais
jours	5	1	0.04	jours
knew	4	1	0.04	knew
l'adapterai	11	1	0.04	l'adapterai
l'adjectif	10	1	0.04	l'adjectif
l'aise	6	1	0.04	l'aise
l'ambiguïté	11	1	0.04	l'ambiguïté
l'analyse	9	1	0.04	l'analyse
langue	6	1	0.04	langue
l'authenticité	14	1	0.04	l'authenticité
l'école	7	1	0.04	l'école
l'esprit	8	1	0.04	l'esprit
l'explication	13	1	0.04	l'explication
logiciel	8	1	0.04	logiciel
lois	4	1	0.04	lois
longtemps	9	1	0.04	longtemps
l'ont	5	1	0.04	l'ont
l'oublie	8	1	0.04	l'oublie
l'outil	7	1	0.04	l'outil
lui	3	1	0.04	lui
manière	7	1	0.04	manière
manqués	7	1	0.04	manqués
meant	5	1	0.04	meant
même	4	1	0.04	même
mémorable	9	1	0.04	mémorable
mémorisées	10	1	0.04	mémorisées
merveilleuse	12	1	0.04	merveilleuse
mes	3	1	0.04	mes
méthode	7	1	0.04	méthode
montrent	8	1	0.04	montrent
montrer	7	1	0.04	montrer
motivée	7	1	0.04	motivée
n'arrêtais	10	1	0.04	n'arrêtais
natifs	6	1	0.04	natifs
n'avais	7	1	0.04	n'avais
niveaux	7	1	0.04	niveaux
numéro	6	1	0.04	numéro
obligé	6	1	0.04	obligé
parfois	7	1	0.04	parfois
partir	6	1	0.04	partir
passons	7	1	0.04	passons
pensant	7	1	0.04	pensant
pensez	6	1	0.04	pensez
plonger	7	1	0.04	plonger
pourquoi	8	1	0.04	pourquoi
pouvez	6	1	0.04	pouvez
pre	3	1	0.04	pre
pré	3	1	0.04	pré
précieuses	10	1	0.04	précieuses
précis	6	1	0.04	précis
premières	9	1	0.04	premières
préparer	8	1	0.04	préparer
preuves	7	1	0.04	preuves
principales	11	1	0.04	principales
professeur	10	1	0.04	professeur
projecteur	10	1	0.04	projecteur
pronom	6	1	0.04	pronom
prouvé	6	1	0.04	prouvé
publique	8	1	0.04	publique
quatre	6	1	0.04	quatre
qu'elle	7	1	0.04	qu'elle
qu'enseignants	14	1	0.04	qu'enseignants
qu'il	5	1	0.04	qu'il
réaliser	8	1	0.04	réaliser
réalité	7	1	0.04	réalité
réels	5	1	0.04	réels
réellement	10	1	0.04	réellement
remplaçant	10	1	0.04	remplaçant
réussi	6	1	0.04	réussi
révélateur	10	1	0.04	révélateur
salles	6	1	0.04	salles
savais	6	1	0.04	savais
schéma	6	1	0.04	schéma
séance	6	1	0.04	séance
sélectivité	11	1	0.04	sélectivité
's'en	5	1	0.04	's'en
sentis	6	1	0.04	sentis
signifiait	10	1	0.04	signifiait
simplifiée	10	1	0.04	simplifiée
smartboard	10	1	0.04	smartboard
souviendrai	11	1	0.04	souviendrai
subjectivité	12	1	0.04	subjectivité
subjonctif	10	1	0.04	subjonctif
suivre	6	1	0.04	suivre
système	7	1	0.04	système
tant	4	1	0.04	tant
tellement	9	1	0.04	tellement
terminé	7	1	0.04	terminé
théorie'	8	1	0.04	théorie'
took	4	1	0.04	took
trop	4	1	0.04	trop
utilisiez	9	1	0.04	utilisiez
vais	4	1	0.04	vais
vient	5	1	0.04	vient
vivre	5	1	0.04	vivre
voir	4	1	0.04	voir
voulais	7	1	0.04	voulais
voyais	6	1	0.04	voyais
voyait	6	1	0.04	voyait
voyons	6	1	0.04	voyons
'we'	4	1	0.04	'we'
wildcards	9	1	0.04	wildcards
advice	6	3	0.03	advice, example, lesson
agent	5	4	0.03	active, agent, representative, specific
aspect	6	6	0.03	aspect, background, hand, side, view
bit	3	13	0.03	bit, example, number, part, spot, turn
commencer	9	4	0.03	commencer, exercise, started, starting
emotion	7	4	0.03	emotion, feeling, fit, little
face	4	10	0.03	approach, face, person, presentation, someone, turn, type
file	4	8	0.03	file, formation, process, register
hand	4	9	0.03	ability, guide, hand, help, right, side
hated	5	2	0.03	emotion, hated
hinder	6	3	0.03	hinder, screen, stop
immediate	9	2	0.03	immediate, prompt
lesson	6	7	0.03	example, exercise, lesson, meaning, teaching
levels	6	3	0.03	levels, place, story
lieu	4	9	0.03	lieu, part, place, positive
lives	5	5	0.03	active, board, experience, lives
mandatory	9	2	0.03	mandatory, required
reflexive	9	2	0.03	reflexive, response
screen	6	6	0.03	analyze, background, screen, show
speech	6	5	0.03	debate, note, prompt, speech, word
spot	4	4	0.03	change, dive, four, spot
age	3	5	0.02	age, change, old, turn
background	10	4	0.02	aspect, background, screen, view
four	4	4	0.02	figure, four, spot
full	4	4	0.02	change, full, good, goodness
genuinely	9	3	0.02	genuinely, good, old
intelligence	12	5	0.02	ability, intelligence, mind, word
sample	6	4	0.02	example, representative, sample, tried
stop	4	8	0.02	clear, conclusion, place, spot, stop
transcript	10	2	0.02	transcript, transcription
fin	3	4	0.01	figure, fin, fit
sentiment	9	3	0.01	change, feeling, sentiment
signifier	9	3	0.01	mean, signifier, word
