# Supplementary material for: The Efficacy of Digital Inductive Models in Enhancing Linguistic Thinking Among Pre-Service FFL Student-Teachers
Source: Research Square preprint supplement (doi:10.21203/rs.3.rs-7720531/v1), 2025-09-30
Supplement: Supplementary file 3 [file ca6e97bc22b476aa75f5a9ba.docx]

**Appendix A: Linguistic Analysis Task (LAT) (Pre-Test/Post-Test)**

**Participant ID:** _______________
**Date:** _______________

**Instructions:** This task is designed to assess your ability to analyze linguistic patterns in French. There are two parts. Please read the instructions for each part carefully and provide your answers in the space provided. Your responses will help us understand how you approach linguistic analysis.

**Part A: Pattern Recognition and Explanation (10 points)**

**Instructions:** For each pair of sentences below, please (1) identify the key grammatical difference, and (2) explain the change in meaning or nuance that results from this difference.

**1. Sentence Pair A:**
a. *Il admet que son projet* ***a*** *des faiblesses.*
b. *Admettons que son projet* ***ait*** *des faiblesses, que ferions-nous ?*

**Your Analysis:**
____________________________________________________________________________________________________________________________________________________________

**2. Sentence Pair B:**
a. *C'est la seule solution que je* ***connais****.*
b. *C'est la seule solution que je* ***connaisse****.*

**Your Analysis:**
____________________________________________________________________________________________________________________________________________________________

**Part B: Hypothesis Testing from Data (10 points)**

**Instructions:** Examine the authentic language data below. Based **only** on these examples, formulate a general rule or principle that explains the pattern you observe.

**Data Set: Placement and Meaning of French Adjectives**

| Adjective Before Noun | Adjective After Noun |
| --- | --- |
| 1. C'est un **grand** homme. (*He is a great man.*) | 1. C'est un homme **grand**. (*He is a tall man.*) |
| 2. Voilà mon **cher** ami. (*Here is my dear friend.*) | 2. C'est une voiture **chère**. (*It's an expensive car.*) |
| 3. Il a une **triste** mine. (*He has a sorry look.*) | 3. C'est une histoire **triste**. (*It's a sad story.*) |
| 4. C'est mon **ancien** professeur. (*He is my former teacher.*) | 4. C'est un meuble **ancien**. (*It's an antique piece of furniture.*) |

**Your Formulated Rule/Principle:**
____________________________________________________________________________________________________________________________________________________________

**Total Score: /20**

**Appendix B: Weekly Reflective Journal Prompts**

**Instructions:** At the end of each weekly session, please take 10-15 minutes to respond to the following prompts in your digital journal. Your reflections should be honest and detailed. There are no right or wrong answers.

**Weekly Prompts:**

1. **Discovery and Process:**
   - Describe your experience working with the digital corpus and concordancer this week. What was the most interesting or surprising linguistic pattern you discovered? Please provide a specific example.
2. **Changing Perceptions:**
   - How does this inductive way of learning grammar compare to how you have learned or taught it in the past? What are your thoughts and feelings about this difference?
3. **Affordances and Challenges:**
   - What was the most challenging aspect of this week's task? (This could be technical, conceptual, or collaborative.)
   - What aspect felt most helpful or empowering for your own understanding of French?
4. **Future Pedagogical Practice:**
   - Describe one specific way you could adapt or use an activity like this week's in your future FFL classroom. Who would it be for, and what would your students learn?

**Appendix C: Semi-Structured Focus Group Protocol**

**Research Title:** The Efficacy of Digital Inductive Models in Enhancing Linguistic Thinking Among Pre-Service Teachers

**Moderator:** Professor FA
**Date:** [11-1-2025]
**Group Number:** [Group # 1]

**Introduction (5 minutes)**
"Good morning and thank you all for being here. My name is [Name], and I’ll be moderating our discussion today. The purpose of this focus group is to hear about your experiences over the past 10 weeks working with the digital inductive learning model. We want to understand your honest thoughts, what worked well, and what was challenging.

There are no right or wrong answers; we are interested in your unique perspectives. The session will last about 60 minutes. It is being audio-recorded for transcription purposes, but all of your comments will be anonymized to ensure confidentiality. Please feel free to speak openly and build on each other’s ideas. Does anyone have any questions before we begin?"

**Guiding Questions:**

**1. Opening Question (5 minutes)**

- "To get us started, I'd like each of you to share one word or a short phrase that comes to mind when you think about your experience learning French grammar with the digital tools this semester."

**2. Impact on Linguistic Thinking (15 minutes)**

- "Thinking about your own understanding of French grammar, how has this approach of using digital tools to discover patterns changed—if at all—the way you *think* about language rules and structures?"
  - *Probe:* Can you give a specific example of a grammar point that you see differently now?
  - *Probe:* How did it feel to create your own "rules" from data compared to being given the rules from a book?

**3. Perceptions of Pedagogical Value (15 minutes)**

- "Let’s talk about your future as teachers. How likely are you to use this kind of data-driven, inductive approach in your own classrooms?"
  - *Probe:* Why or why not? What would make you more confident in using it?
  - *Probe:* For what kind of students or what kind of grammar topics do you think this method would be most effective? Or least effective?

**4. Affordances and Challenges (15 minutes)**

- "What were the biggest advantages or benefits of learning this way? What did these digital tools allow you to do that you couldn't do before?"
  - *Probe:* Can you describe a specific "aha" moment you or your group had?
- "On the other hand, what were the main difficulties or frustrations you encountered while using the model?"
  - *Probe:* Were the challenges more technical (using the software) or more conceptual (thinking inductively)?
  - *Probe:* Did working in groups help or hinder the process? How?

**5. Closing Question (5 minutes)**

- "Finally, is there any other advice you would give to us for improving this program, or anything else you’d like to share about your experience that we haven’t discussed yet?"

**Wrap-up:**
"Thank you all so much for your time and your thoughtful contributions. Your insights are incredibly valuable to this research. The recording will now be stopped."
