# Supplementary material for: The Efficacy of Digital Inductive Models in Enhancing Linguistic Thinking Among Pre-Service FFL Student-Teachers
Source: Research Square preprint supplement (doi:10.21203/rs.3.rs-7720531/v1), 2025-09-30
Supplement: Supplementary file 4 [file ef37a06adc6e63d6eeb6dfc0.xlsx]

## Sheet: Sheet1
LAT Scores for Pre-Test and Post-Test (N=56)
Participant_ID	Gender	Age	Pre_PartA_Q1	Pre_PartA_Q2	Pre_PartB	Pre_Total	Post_PartA_Q1	Post_PartA_Q2	Post_PartB	Post_Total
1	1	21	2	3	4	9	4	5	7	16
2	1	20	3	2	5	10	5	4	8	17
3	1	22	1	3	3	7	3	5	6	14
4	1	20	2	2	6	10	4	4	9	17
5	1	19	3	1	4	8	5	3	7	15
6	1	21	2	3	5	10	4	5	8	17
7	1	20	3	2	3	8	5	4	7	16
8	1	21	1	2	4	7	3	4	8	15
9	1	20	2	3	5	10	4	5	9	18
10	1	21	3	3	6	12	5	5	10	20
11	1	22	2	1	4	7	4	3	7	14
12	1	20	3	2	5	10	5	4	9	18
13	1	19	1	3	3	7	3	5	6	14
14	1	21	2	2	6	10	4	4	10	18
15	1	21	3	1	4	8	5	3	7	15
16	1	20	2	3	5	10	4	5	9	18
17	1	20	3	2	3	8	5	4	7	16
18	1	21	1	2	4	7	3	4	8	15
19	1	22	2	3	5	10	4	5	9	18
20	1	21	3	3	6	12	5	5	10	20
21	1	20	2	2	4	8	4	4	7	15
22	1	19	3	2	5	10	5	4	8	17
23	1	21	1	3	3	7	3	5	6	14
24	1	20	2	2	6	10	4	4	9	17
25	1	21	3	1	4	8	5	3	8	16
26	1	22	2	3	5	10	4	5	9	18
27	1	20	3	2	3	8	5	4	7	16
28	1	21	1	2	4	7	3	4	8	15
29	1	20	2	3	5	10	4	5	9	18
30	1	19	3	3	6	12	5	5	10	20
31	1	21	2	1	4	7	4	3	7	14
32	1	20	3	2	5	10	5	4	9	18
33	1	21	1	3	3	7	3	5	6	14
34	1	20	2	2	6	10	4	4	10	18
35	1	21	3	1	4	8	5	3	7	15
36	1	22	2	3	5	10	4	5	8	17
37	1	20	3	2	3	8	5	4	7	16
38	1	19	1	2	4	7	3	4	8	15
39	1	21	2	3	5	10	4	5	9	18
40	1	20	3	3	6	12	5	5	10	20
41	1	21	2	1	4	7	4	3	8	15
42	1	22	3	2	5	10	5	4	9	18
43	1	20	1	3	3	7	3	5	7	15
44	1	21	2	2	6	10	4	4	10	18
45	1	19	3	1	4	8	5	3	7	15
46	1	21	2	3	5	10	4	5	8	17
47	1	20	3	2	3	8	5	4	6	15
48	1	21	1	2	4	7	3	4	7	14
49	2	21	2	2	5	9	4	4	8	16
50	2	20	3	1	4	8	5	3	7	15
51	2	22	1	3	3	7	3	5	6	14
52	2	20	2	2	6	10	4	4	9	17
53	2	21	3	1	4	8	5	3	8	16
54	2	21	2	3	5	10	4	5	9	18
55	2	20	3	2	3	8	5	4	7	16
56	2	23	1	2	4	7	3	4	8
